# Supplementary material
Source: PubMed Central journal article supplement (PMC3078406)
Supplement: 1012676108_pnas.201012676SI.pdf [file 1012676108_pnas.201012676SI.pdf]

# Supporting Information

## Gambrill and Barria 10.1073/pnas.1012676108

### SI Materials and Methods

**Constructs.** EGFP-tagged NMDAR subunits were cloned in pCI plasmid (Promega) and described previously (1). Chimeric NR2 subunits NR2A-CTB and NR2B-CTA were constructed by amplifying the entire C terminus from residue L797 in NR2A and amino acid L793 in NR2B and adding a Kpn1 and Xho1 restriction site at the 5' end of the NR2A and NR2B PCR products respectively. A second PCR fragment was amplified from the endogenously occurring Kpn1 site in NR2A and Sph1 in NR2B to position L797 or L793 with a Kpn1 or Xho1 restriction site at the 3' end. These two PCR fragments were subcloned into the corresponding pCI-EGP-NR2 subunit.

**siRNA.** Endogenous NR2A and NR2B subunits were knocked down using the pSuper RNAi system from Oligoengine, a mammalian expression vector that directs intracellular synthesis of siRNA-like transcripts. Preliminary data were collected using pSuper plasmids obtained from Morgan Sheng (Genentech, South San Francisco, CA) and described previously (2). Subsequently, we cloned the same target sequence into pSuper.gfp/neo (Oligoengine; VEC-PBS-0006) to take advantage of eGFP coexpression with the desired siRNA. Empty vector and scrambled siRNA were used as controls.

**Fixed Imaging.** CA1 neurons were imaged on an Olympus FV confocal laser scanning microscope with an Olympus 60 $\times$  objective (N.A. 1.10). Successful expression of mCherry-tagged NMDARs was confirmed using epifluorescence. Dendrites were imaged using the green channel with 0.5- $\mu$ M steps in the z axis. Each

optical plane was averaged two or three times (Kalman filter). Image analysis was done using ImageJ version 1.4.

**Live Cell Imaging.** For motility experiments, transfected slices were perfused with artificial cerebrospinal fluid constantly gassed with 5%CO<sub>2</sub>/95%O<sub>2</sub>. Temperature in the imaging chamber was held at 34 °C. A section of dendrite was repeatedly imaged as described every 10 min for 120 min. For each cell, one to two sections of dendrite were imaged. For imaging experiments where eGFP was used as a cytosolic marker, the eGFP tag in NMDAR subunits was replaced with mCherry.

**Analysis of Spines.** Images were analyzed using ImageJ. A total dendritic length of 160–1,000  $\mu$ m, consisting of the primary apical dendrite and secondary branches, was analyzed per cell. Spines were defined as protrusions more than 0.5  $\mu$ m and less than 3  $\mu$ m long and with a round head. A region of interest (ROI) was drawn around the selected spine. Mean fluorescent intensity in each plane of the Z-stack containing the spine was calculated (S), background subtracted (B), and summed. A ROI of equal size was drawn on the dendrite adjacent to the spine, and the mean fluorescent intensity of each plane was calculated (D), background subtracted (B), and the average of these values taken. Spine fluorescence was normalized by dendrite fluorescence. Volume index =  $\Sigma(S_n - B_n) / (\Sigma(D_n - B_n) / N)$ . For motility analysis, spines visible in the first image were marked and events in subsequent images counted. Events were defined as the loss of an existing spine, the emergence of a new spine, and the appearance or extension of filopodia. Filopodia were defined as protrusions over 3  $\mu$ m in length, with no visible head.

1. Barria A, Malinow R (2002) Subunit-specific NMDA receptor trafficking to synapses. *Neuron* 35:345–353.
2. Kim MJ, Dunah AW, Wang YT, Sheng M (2005) Differential roles of NR2A- and NR2B-containing NMDA receptors in Ras-ERK signaling and AMPA receptor trafficking. *Neuron* 46:745–760.



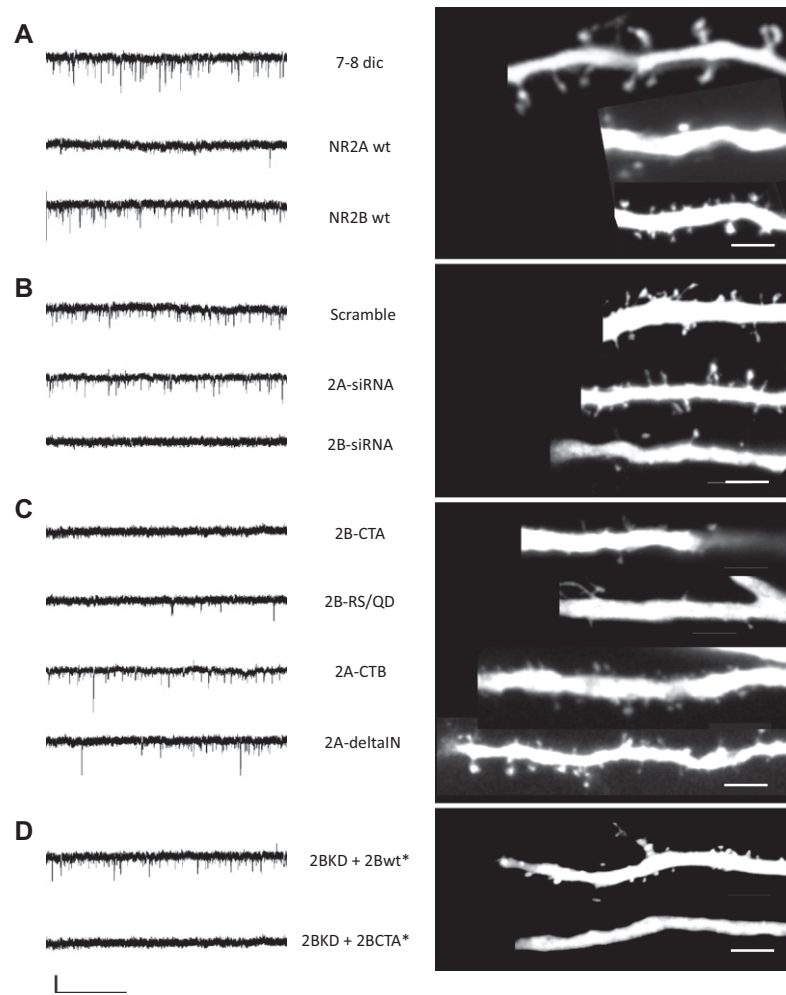

**Fig. S2.** Spine density imaging examples and mEPSC traces. (A) Examples from nontransfected cells 7–8 dic (*Top*), cell of equivalent age-expressing NR2A WT (*Middle*) or NR2B WT (*Bottom*). (B) Examples from cells expressing scrambled siRNA (*Top*), 2A siRNA (*Middle*), or 2B siRNA (*Bottom*); compared in the text to nontransfected 7–8 dic cells (A). (C) Examples from cells expressing 2B-CTA (*Top*), 2B-RS/QD (second from *Top*), 2A-CTB (second from *Bottom*), or 2A $\Delta$ IN (*Bottom*); compared in text to 7–8 dic nontransfected, NR2A WT-, and NR2B WT-expressing cells (A). (D) Examples from cells expressing 2B siRNA and 2B\* (resistant to knockdown) WT (*Upper*) or 2B-CTA\* (*Lower*); compared in text to cells expressing 2B siRNA alone (B) and 7–8 dic nontransfected (A). (mEPSC trace scale bar, 20 pA and 1.3 s; spine density imaging scale bar, 5  $\mu$ m.)

**Table S1. Student *t* test *P* values**

| Figure  | Variable             | Cond 1     | Cond 2      | <i>P</i> value |
|---------|----------------------|------------|-------------|----------------|
| Fig. 1C | Spine density        | 4–5 dic    | 7–8 dic     | 0.0000         |
|         | Spine density        | 7–8 dic    | 11–12 dic   | 0.7728         |
| Fig. 1D | Total motility       | 4–5 dic    | 7–8 dic     | 0.6898         |
|         | Total motility       | 7–8 dic    | 11–12 dic   | 0.0012         |
| Fig. 1E | Filopodia            | 4–5 dic    | 7–8 dic     | 0.1138         |
|         | Filopodia            | 7–8 dic    | 11–12 dic   | 0.0154         |
| Fig. 1F | Additions            | 4–5 dic    | 7–8 dic     | 0.4393         |
|         | Additions            | 7–8 dic    | 11–12 dic   | 0.0178         |
| Fig. 1G | Retractions          | 4–5 dic    | 7–8 dic     | 0.2476         |
|         | Retractions          | 7–8 dic    | 11–12 dic   | 0.0274         |
| Fig. 2B | Spine density        | 7–8 dic    | 2A          | 0.0081         |
|         | Spine density        | 7–8 dic    | 2B          | 0.7874         |
| Fig. 2C | Total motility       | 7–8 dic    | 2A          | 0.0470         |
|         | Total motility       | 7–8 dic    | 2B          | 0.0170         |
| Fig. 2D | Filopodia            | 7–8 dic    | 2A          | 0.0810         |
|         | Filopodia            | 7–8 dic    | 2B          | 0.3594         |
| Fig. 2E | Additions            | 7–8 dic    | 2A          | 0.0388         |
|         | Additions            | 7–8 dic    | 2B          | 0.0370         |
| Fig. 2F | Retractions          | 7–8 dic    | 2A          | 0.4035         |
|         | Retractions          | 7–8 dic    | 2B          | 0.0328         |
| Fig. 2G | Spine volume         | 4–5 dic    | 7–8 dic     | 0.2724         |
|         | Spine volume         | 7–8 dic    | 11–12 dic   | 0.4566         |
|         | Spine volume         | 7–8 dic    | 2A          | 0.019          |
|         | Spine volume         | 7–8 dic    | 2B          | 0.7157         |
| Fig. 3A | EPSCs peak amplitude | Control NT | 2B KD       | 0.0041         |
|         | EPSCs peak amplitude | Control NT | 2A KD       | 0.3528         |
| Fig. 3B | THD                  | Control NT | 2B KD       | 0.0300         |
|         | THD                  | Control NT | 2A KD       | 0.0308         |
| Fig. 4B | Spine density        | 7–8 dic    | Scrambled   | 0.6754         |
|         | Spine density        | 7–8 dic    | 2B KD       | 0.0074         |
|         | Spine density        | 7–8 dic    | 2A KD       | 0.2360         |
| Fig. 4C | Total motility       | 7–8 dic    | Scrambled   | 0.9027         |
|         | Total motility       | 7–8 dic    | 2B KD       | 0.0021         |
|         | Total motility       | 7–8 dic    | 2A KD       | 0.1840         |
| Fig. 4D | Filopodia            | 7–8 dic    | Scrambled   | 0.1475         |
|         | Filopodia            | 7–8 dic    | 2B KD       | 0.0062         |
|         | Filopodia            | 7–8 dic    | 2A KD       | 0.5496         |
| Fig. 4E | Additions            | 7–8 dic    | Scrambled   | 0.8056         |
|         | Additions            | 7–8 dic    | 2B KD       | 0.0462         |
|         | Additions            | 7–8 dic    | 2A KD       | 0.3647         |
| Fig. 4F | Retractions          | 7–8 dic    | Scrambled   | 0.4609         |
|         | Retractions          | 7–8 dic    | 2B KD       | 0.4428         |
|         | Retractions          | 7–8 dic    | 2A KD       | 0.1909         |
| Fig. 5A | Spine density        | 7–8 dic    | 2A          | 0.0081         |
|         | Spine density        | 7–8 dic    | 2BCTA       | 0.0354         |
|         | Spine density        | 7–8 dic    | 2BRSQD      | 0.0446         |
| Fig. 5C | Spine density        | 7–8 dic    | 2B          | 0.7874         |
|         | Spine density        | 7–8 dic    | 2ACTB       | 0.7551         |
|         | Spine density        | 7–8 dic    | 2AΔIN       | 0.8732         |
| Fig. 5E | Spine volume         | 7–8 dic    | 2A          | 0.019          |
|         | Spine volume         | 7–8 dic    | 2BCTA       | 0.036          |
|         | Spine volume         | 7–8 dic    | 2BRSQD      | 0.008          |
| Fig. 5F | Spine volume         | 7–8 dic    | 2B          | 0.7157         |
|         | Spine volume         | 7–8 dic    | 2ACTB       | 0.5770         |
|         | Spine volume         | 7–8 dic    | 2AΔIN       | 0.1220         |
| Fig. 6B | Spine density        | 7–8 dic    | 2B KD       | 0.0074         |
|         | Spine density        | 7–8 dic    | 2BKD + 2B*  | 0.3321         |
|         | Spine density        | 7–8 dic    | 2BKD + CTA* | 0.0187         |
